# Supplementary material
Source: MDPI journal article supplement (https://www.mdpi.com/2073-4352/2/2/446)
Supplement: s1 [file s1]

## Supplementary Information

Figure S1. Picture of wired crystal of **11** for conductivity measurement.

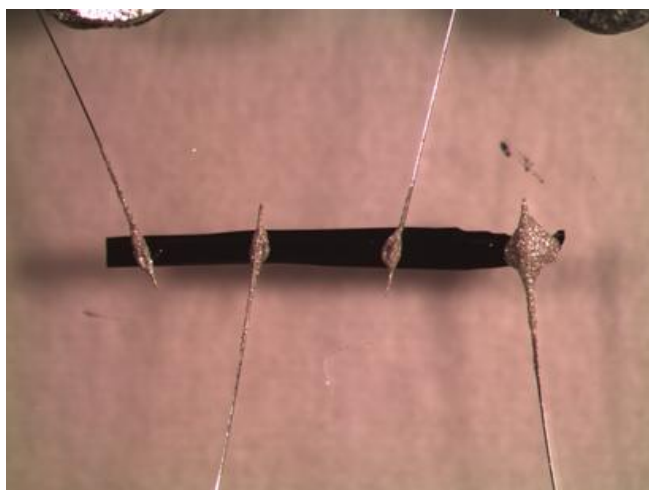

Figure S2. EPR spectra of radical **11** at room temperature.

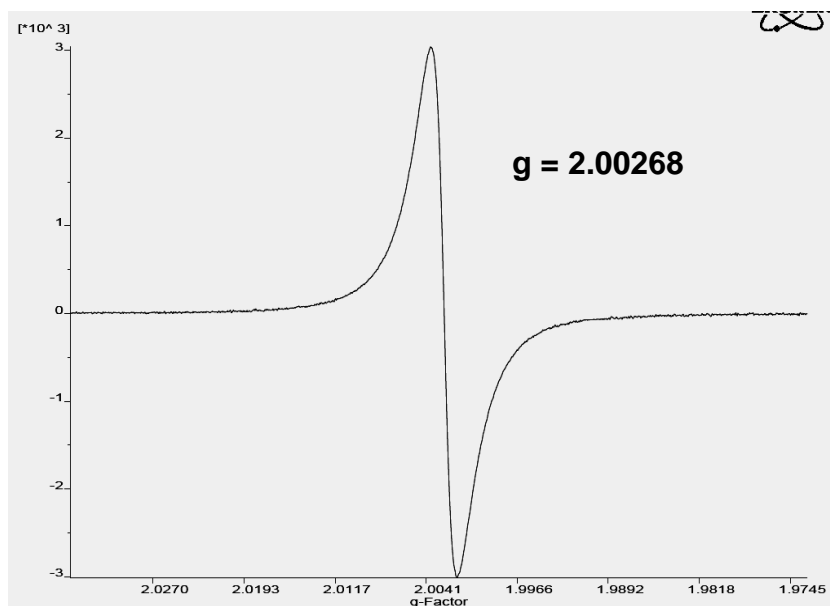

**Table S1–S5.** Details of crystallographic data for **11**; crystallographic cif file.**Table S1.** Crystal data and structure refinement for 11.

| Crystal Parameters                | Values                                                                                                                         |
|-----------------------------------|--------------------------------------------------------------------------------------------------------------------------------|
| Empirical formula                 | C <sub>40</sub> H <sub>40</sub> BN <sub>2</sub> O <sub>2</sub>                                                                 |
| Formula weight                    | 591.56                                                                                                                         |
| Temperature                       | 100(2) K                                                                                                                       |
| Wavelength                        | 0.71073 Å                                                                                                                      |
| Crystal system                    | Monoclinic                                                                                                                     |
| Space group                       | C2/c                                                                                                                           |
| Unit cell dimensions              | $a = 21.4373(15)$ Å $\alpha = 90^\circ$<br>$b = 6.1623(4)$ Å $\beta = 97.597^\circ$<br>$c = 23.2775(16)$ Å $\gamma = 90^\circ$ |
| Volume                            | 3048.0(4) Å <sup>3</sup>                                                                                                       |
| Crystal Parameters                | Values                                                                                                                         |
| Z                                 | 4                                                                                                                              |
| Density (calculated)              | 1.289 Mg/m <sup>3</sup>                                                                                                        |
| Absorption coefficient            | 0.078 mm <sup>-1</sup>                                                                                                         |
| F(000)                            | 1260                                                                                                                           |
| Crystal size                      | 0.40 × 0.39 × 0.15 mm <sup>3</sup>                                                                                             |
| Theta range for data collection   | 1.77 to 27.52 °                                                                                                                |
| Index ranges                      | -25 ≤ h ≤ 27, -8 ≤ k ≤ 7, -30 ≤ l ≤ 30                                                                                         |
| Reflections collected             | 19619                                                                                                                          |
| Independent reflections           | 3460 [R(int) = 0.0323]                                                                                                         |
| Completeness to theta = 27.52 °   | 98.7 °                                                                                                                         |
| Absorption correction             | Sadabs                                                                                                                         |
| Max. and min. transmission        | 0.9884 and 0.9694                                                                                                              |
| Refinement method                 | Full-matrix least-squares on F <sup>2</sup>                                                                                    |
| Data/restraints/parameters        | 3460/0/265                                                                                                                     |
| Goodness-of-fit on F <sup>2</sup> | 1.015                                                                                                                          |
| Final R indices [I > 2σ(I)]       | R1 = 0.0401, wR2 = 0.1005                                                                                                      |
| R indices (all data)              | R1 = 0.0607, wR2 = 0.1157                                                                                                      |
| Largest diff. Peak and hole       | 0.303 and -0.197 e.Å <sup>-3</sup>                                                                                             |

**Table S2.** Atomic coordinates ( $\times 10^4$ ) and equivalent isotropic displacement parameters ( $\text{\AA}^2 \times 10^3$ ) for **11**.  $U(\text{eq})$  is defined as one third of the trace of the orthogonalized  $U^{ij}$  tensor.

| Atom  | x        | y       | z       | $U(\text{eq})$ |
|-------|----------|---------|---------|----------------|
| B(1)  | 0        | 7343(4) | 2500    | 20(1)          |
| O(1)  | -200(1)  | 8778(2) | 2941(1) | 22(1)          |
| N(1)  | -544(1)  | 5835(2) | 2243(1) | 21(1)          |
| C(1)  | -738(1)  | 8511(2) | 3167(1) | 20(1)          |
| C(2)  | -879(1)  | 9986(2) | 3591(1) | 23(1)          |
| C(3)  | -1408(1) | 9728(2) | 3856(1) | 24(1)          |
| C(4)  | -2349(1) | 7557(3) | 4014(1) | 28(1)          |
| C(5)  | -2722(1) | 5749(3) | 3886(1) | 30(1)          |
| C(6)  | -2589(1) | 4273(3) | 3467(1) | 28(1)          |
| C(7)  | -1932(1) | 3187(2) | 2714(1) | 24(1)          |
| C(8)  | -1446(1) | 3567(2) | 2405(1) | 24(1)          |
| C(9)  | -1036(1) | 5381(2) | 2530(1) | 20(1)          |
| C(20) | -410(1)  | 4411(2) | 1769(1) | 22(1)          |
| C(21) | -842(1)  | 4697(2) | 1199(1) | 22(1)          |
| C(22) | -633(1)  | 3125(2) | 756(1)  | 27(1)          |
| C(23) | -1031(1) | 3323(3) | 163(1)  | 30(1)          |
| C(24) | -1052(1) | 5644(3) | -58(1)  | 30(1)          |
| C(25) | -1274(1) | 7186(3) | 386(1)  | 30(1)          |
| C(26) | -855(1)  | 7012(2) | 970(1)  | 25(1)          |
| C(3A) | -1818(1) | 7936(2) | 3726(1) | 22(1)          |
| C(6A) | -2077(1) | 4608(2) | 3161(1) | 23(1)          |
| C(9A) | -1152(1) | 6789(2) | 2997(1) | 19(1)          |
| C(9B) | -1683(1) | 6448(2) | 3294(1) | 20(1)          |

**Table S3.** Bond lengths [ $\text{\AA}$ ] and angles [ $^\circ$ ] for **11**.

| Bond         | Bond Length ( $\text{\AA}$ ) | Bond         | Bond Length ( $\text{\AA}$ ) |
|--------------|------------------------------|--------------|------------------------------|
| B(1)-O(1)#1  | 1.4622(16)                   | B(1)-O(1)    | 1.4622(16)                   |
| B(1)-N(1)    | 1.5477(17)                   | B(1)-N(1)#1  | 1.5477(17)                   |
| O(1)-C(1)    | 1.3387(16)                   | N(1)-C(9)    | 1.3511(18)                   |
| N(1)-C(20)   | 1.4682(17)                   | C(1)-C(2)    | 1.4045(19)                   |
| C(1)-C(9A)   | 1.4066(19)                   | C(2)-C(3)    | 1.368(2)                     |
| C(2)-H(2)    | 0.962(19)                    | C(3)-C(3A)   | 1.419(2)                     |
| C(3)-H(3)    | 0.986(18)                    | C(4)-C(5)    | 1.380(2)                     |
| C(4)-C(3A)   | 1.414(2)                     | C(4)-H(4)    | 1.001(18)                    |
| C(5)-C(6)    | 1.390(2)                     | C(5)-H(5)    | 0.953(18)                    |
| C(6)-C(6A)   | 1.400(2)                     | C(6)-H(6)    | 1.002(18)                    |
| C(7)-C(8)    | 1.362(2)                     | C(7)-C(6A)   | 1.426(2)                     |
| C(7)-H(7)    | 0.986(18)                    | C(8)-C(9)    | 1.428(2)                     |
| C(8)-H(8)    | 0.979(18)                    | C(9)-C(9A)   | 1.4373(19)                   |
| C(20)-C(21)  | 1.5238(18)                   | C(20)-H(20A) | 0.993(18)                    |
| C(20)-H(20B) | 1.014(18)                    | C(21)-C(26)  | 1.5224(19)                   |
| C(21)-C(22)  | 1.526(2)                     | C(21)-H(21)  | 1.047(18)                    |
| C(22)-C(23)  | 1.528(2)                     | C(22)-H(22A) | 1.005(18)                    |
| C(22)-H(22B) | 0.977(18)                    | C(23)-C(24)  | 1.519(2)                     |

Table S3. Cont.

| Bond                | Bond Length (Å) | Bond               | Bond Length (Å) |
|---------------------|-----------------|--------------------|-----------------|
| C(23)-H(23A)        | 1.012(18)       | C(23)-H(23B)       | 1.040(18)       |
| C(24)-C(25)         | 1.525(2)        | C(24)-H(24A)       | 1.000(18)       |
| C(24)-H(24B)        | 1.019(18)       | C(25)-C(26)        | 1.530(2)        |
| C(25)-H(25A)        | 1.036(18)       | C(25)-H(25B)       | 1.011(18)       |
| C(26)-H(26A)        | 1.017(18)       | C(26)-H(26B)       | 1.021(18)       |
| C(3A)-C(9B)         | 1.4194(19)      | C(6A)-C(9B)        | 1.4238(19)      |
| C(9A)-C(9B)         | 1.4223(19)      |                    |                 |
| O(1)#1-B(1)-O(1)    | 105.57(16)      | O(1)#1-B(1)-N(1)   | 111.62(6)       |
| O(1)-B(1)-N(1)      | 110.97(6)       | O(1)#1-B(1)-N(1)#1 | 110.97(6)       |
| O(1)-B(1)-N(1)#1    | 111.62(6)       | N(1)-B(1)-N(1)#1   | 106.19(16)      |
| C(1)-O(1)-B(1)      | 123.35(10)      | C(9)-N(1)-C(20)    | 119.40(12)      |
| C(9)-N(1)-B(1)      | 122.10(9)       | C(20)-N(1)-B(1)    | 115.95(10)      |
| O(1)-C(1)-C(2)      | 118.27(12)      | O(1)-C(1)-C(9A)    | 121.76(12)      |
| C(2)-C(1)-C(9A)     | 119.96(13)      | C(3)-C(2)-C(1)     | 120.66(13)      |
| C(3)-C(2)-H(2)      | 122.3(10)       | C(1)-C(2)-H(2)     | 117.0(10)       |
| C(2)-C(3)-C(3A)     | 121.39(13)      | C(2)-C(3)-H(3)     | 121.1(10)       |
| C(3A)-C(3)-H(3)     | 117.5(10)       | C(5)-C(4)-C(3A)    | 120.73(14)      |
| C(5)-C(4)-H(4)      | 121.5(10)       | C(3A)-C(4)-H(4)    | 117.7(10)       |
| C(4)-C(5)-C(6)      | 120.87(14)      | C(4)-C(5)-H(5)     | 118.5(11)       |
| C(6)-C(5)-H(5)      | 120.7(11)       | C(5)-C(6)-C(6A)    | 120.45(14)      |
| C(5)-C(6)-H(6)      | 121.3(10)       | C(6A)-C(6)-H(6)    | 118.2(10)       |
| C(8)-C(7)-C(6A)     | 122.42(13)      | C(8)-C(7)-H(7)     | 120.5(10)       |
| C(6A)-C(7)-H(7)     | 117.1(10)       | C(7)-C(8)-C(9)     | 121.30(13)      |
| C(7)-C(8)-H(8)      | 120.0(10)       | C(9)-C(8)-H(8)     | 118.6(10)       |
| N(1)-C(9)-C(8)      | 124.12(12)      | N(1)-C(9)-C(9A)    | 118.25(12)      |
| C(8)-C(9)-C(9A)     | 117.62(13)      | N(1)-C(20)-C(21)   | 115.40(11)      |
| N(1)-C(20)-H(20A)   | 109.6(10)       | C(21)-C(20)-H(20A) | 110.2(10)       |
| N(1)-C(20)-H(20B)   | 106.9(10)       | C(21)-C(20)-H(20B) | 107.8(10)       |
| H(20A)-C(20)-H(20B) | 106.6(14)       | C(26)-C(21)-C(20)  | 113.24(12)      |
| C(26)-C(21)-C(22)   | 110.54(12)      | C(20)-C(21)-C(22)  | 108.45(12)      |
| C(26)-C(21)-H(21)   | 106.8(10)       | C(20)-C(21)-H(21)  | 108.6(10)       |
| C(22)-C(21)-H(21)   | 109.1(10)       | C(21)-C(22)-C(23)  | 112.44(13)      |
| C(21)-C(22)-H(22A)  | 109.7(10)       | C(23)-C(22)-H(22A) | 111.4(10)       |
| C(21)-C(22)-H(22B)  | 107.8(10)       | C(23)-C(22)-H(22B) | 108.9(10)       |
| H(22A)-C(22)-H(22B) | 106.3(14)       | C(24)-C(23)-C(22)  | 111.62(13)      |
| C(24)-C(23)-H(23A)  | 110.5(10)       | C(22)-C(23)-H(23A) | 108.7(10)       |
| C(24)-C(23)-H(23B)  | 108.2(10)       | C(22)-C(23)-H(23B) | 109.9(10)       |
| H(23A)-C(23)-H(23B) | 107.9(14)       | C(23)-C(24)-C(25)  | 110.85(13)      |
| C(23)-C(24)-H(24A)  | 108.4(10)       | C(25)-C(24)-H(24A) | 111.5(10)       |
| C(23)-C(24)-H(24B)  | 109.6(10)       | C(25)-C(24)-H(24B) | 107.7(10)       |
| H(24A)-C(24)-H(24B) | 108.7(14)       | C(24)-C(25)-C(26)  | 111.05(13)      |
| C(24)-C(25)-H(25A)  | 109.1(10)       | C(26)-C(25)-H(25A) | 110.1(9)        |
| C(24)-C(25)-H(25B)  | 109.5(10)       | C(26)-C(25)-H(25B) | 109.6(10)       |
| H(25A)-C(25)-H(25B) | 107.5(14)       | C(21)-C(26)-C(25)  | 111.03(12)      |
| C(21)-C(26)-H(26A)  | 107.2(10)       | C(25)-C(26)-H(26A) | 108.3(10)       |
| C(21)-C(26)-H(26B)  | 109.0(10)       | C(25)-C(26)-H(26B) | 110.4(10)       |

Table S3. Cont.

| Bond                | Bond Length (Å) | Bond              | Bond Length (Å) |
|---------------------|-----------------|-------------------|-----------------|
| H(26A)-C(26)-H(26B) | 110.8(14)       | C(4)-C(3A)-C(3)   | 122.86(13)      |
| C(4)-C(3A)-C(9B)    | 118.77(13)      | C(3)-C(3A)-C(9B)  | 118.36(13)      |
| C(6)-C(6A)-C(9B)    | 119.34(13)      | C(6)-C(6A)-C(7)   | 122.84(13)      |
| C(9B)-C(6A)-C(7)    | 117.82(13)      | C(1)-C(9A)-C(9B)  | 119.35(12)      |
| C(1)-C(9A)-C(9)     | 120.14(12)      | C(9B)-C(9A)-C(9)  | 120.50(12)      |
| C(3A)-C(9B)-C(9A)   | 120.03(12)      | C(3A)-C(9B)-C(6A) | 119.81(13)      |
| C(9A)-C(9B)-C(6A)   | 120.16(12)      |                   |                 |

Symmetry transformations used to generate equivalent atoms: #1  $-x, y, -z + 1/2$ .

**Table S4.** Anisotropic displacement parameters ( $\text{Å}^2 \times 10^3$ ) for **11**. The anisotropic displacement factor exponent takes the form:  $-2\pi^2 [ h^2 a^{*2} U^{11} + \dots + 2 h k a \times b \times U^{12} ]$

| Atom  | $U^{11}$ | $U^{22}$ | $U^{33}$ | $U^{23}$ | $U^{13}$ | $U^{12}$ |
|-------|----------|----------|----------|----------|----------|----------|
| B(1)  | 26(1)    | 19(1)    | 16(1)    | 0        | 2(1)     | 0        |
| O(1)  | 26(1)    | 20(1)    | 21(1)    | -3(1)    | 3(1)     | -3(1)    |
| N(1)  | 27(1)    | 19(1)    | 16(1)    | -2(1)    | 1(1)     | 0(1)     |
| C(1)  | 23(1)    | 19(1)    | 16(1)    | 2(1)     | 1(1)     | 1(1)     |
| C(2)  | 30(1)    | 19(1)    | 19(1)    | -2(1)    | 0(1)     | -2(1)    |
| C(3)  | 31(1)    | 22(1)    | 18(1)    | -2(1)    | 2(1)     | 3(1)     |
| C(4)  | 30(1)    | 29(1)    | 24(1)    | 0(1)     | 4(1)     | 4(1)     |
| C(5)  | 27(1)    | 33(1)    | 31(1)    | 5(1)     | 7(1)     | 1(1)     |
| C(6)  | 27(1)    | 26(1)    | 29(1)    | 5(1)     | 0(1)     | -3(1)    |
| C(7)  | 30(1)    | 21(1)    | 22(1)    | 1(1)     | -3(1)    | -5(1)    |
| C(8)  | 32(1)    | 20(1)    | 17(1)    | -1(1)    | -2(1)    | -2(1)    |
| C(9)  | 26(1)    | 19(1)    | 15(1)    | 2(1)     | -3(1)    | 1(1)     |
| C(20) | 28(1)    | 20(1)    | 18(1)    | -2(1)    | 0(1)     | 2(1)     |
| C(21) | 30(1)    | 20(1)    | 17(1)    | -1(1)    | 2(1)     | 1(1)     |
| C(22) | 39(1)    | 20(1)    | 20(1)    | -2(1)    | 4(1)     | 3(1)     |
| C(23) | 49(1)    | 24(1)    | 18(1)    | -3(1)    | 2(1)     | 3(1)     |
| C(24) | 46(1)    | 27(1)    | 18(1)    | 1(1)     | 3(1)     | -1(1)    |
| C(25) | 42(1)    | 22(1)    | 23(1)    | 1(1)     | -2(1)    | 3(1)     |
| C(26) | 35(1)    | 19(1)    | 20(1)    | -1(1)    | 0(1)     | 3(1)     |
| C(3A) | 27(1)    | 23(1)    | 17(1)    | 3(1)     | 1(1)     | 3(1)     |
| C(6A) | 26(1)    | 22(1)    | 20(1)    | 4(1)     | -2(1)    | 0(1)     |
| C(9A) | 24(1)    | 18(1)    | 15(1)    | 1(1)     | -2(1)    | 1(1)     |
| C(9B) | 22(1)    | 20(1)    | 16(1)    | 3(1)     | -3(1)    | 1(1)     |

**Table S5.** Hydrogen coordinates ( $\times 10^4$ ) and isotropic displacement parameters ( $\text{\AA}^2 \times 10^3$ ) for **11**.

| Atom   | x        | y         | z       | U(eq) |
|--------|----------|-----------|---------|-------|
| H(2)   | −593(8)  | 11180(30) | 3680(7) | 32(1) |
| H(3)   | −1514(8) | 10770(30) | 4149(8) | 32(1) |
| H(4)   | −2437(8) | 8620(30)  | 4317(8) | 32(1) |
| H(5)   | −3074(8) | 5540(30)  | 4090(7) | 32(1) |
| H(6)   | −2860(8) | 2970(30)  | 3369(7) | 32(1) |
| H(7)   | −2202(8) | 1900(30)  | 2632(7) | 32(1) |
| H(8)   | −1358(8) | 2540(30)  | 2104(8) | 32(1) |
| H(20A) | −413(8)  | 2870(30)  | 1897(7) | 32(1) |
| H(20B) | 35(9)    | 4740(30)  | 1694(8) | 32(1) |
| H(21)  | −1303(8) | 4320(30)  | 1267(7) | 32(1) |
| H(22A) | −637(8)  | 1600(30)  | 909(8)  | 32(1) |
| H(22B) | −196(9)  | 3450(30)  | 715(7)  | 32(1) |
| H(23A) | −851(8)  | 2320(30)  | −119(8) | 32(1) |
| H(23B) | −1490(9) | 2830(30)  | 190(8)  | 32(1) |
| H(24A) | −1335(8) | 5700(30)  | −435(8) | 32(1) |
| H(24B) | −612(8)  | 6120(30)  | −125(7) | 32(1) |
| H(25A) | −1736(8) | 6820(30)  | 435(7)  | 32(1) |
| H(25B) | −1266(8) | 8730(30)  | 238(7)  | 32(1) |
| H(26A) | −407(9)  | 7400(30)  | 910(8)  | 32(1) |
| H(26B) | −1014(8) | 8020(30)  | 1266(8) | 32(1) |

© 2012 by the authors; licensee MDPI, Basel, Switzerland. This article is an open access article distributed under the terms and conditions of the Creative Commons Attribution license (<http://creativecommons.org/licenses/by/3.0/>).
