# Supplementary material
Source: MDPI journal article supplement (https://www.mdpi.com/2073-4352/2/2/446)
Supplement: s2 [file s2]

data_global

# 1. SUBMISSION DETAILS

_publ_contact_letter

;
     Please consider this CIF submission for publication 

     in the Crystals
; 

_publ_contact_author  'Prof R.C. Haddon'

_publ_contact_author_address

;

University of California

Department of Chemistry 

Riverside, CA 92521 USA 

;
_publ_contact_author_fax    '951-827-2233'

_publ_contact_author_email   ' haddon@ucr.edu '

_publ_requested_journal     'Crystals'

#=============================================================================

# 2. TITLE AND AUTHOR LIST

_publ_section_title

;
    

Synthesis, Structure and Solid State Properties of

Cyclohexanemethylamine Substituted Phenalenyl 

Based Molecular Conductor

;

loop_

_publ_author_name

' Pradip Bag, Mikhail E. Itkis, Sushanta K. Pal ' 

'Elena Bekyarova, Bruno Donnadieu, Robert C. Haddon * ' 

_publ_author_address

;

University of California

Department of Chemistry

Riverside, CA 92521 USA                                             

;

#==============================================================================

_publ_section_references 

;

Bruker (2009). COSMO  version 1.60. Bruker AXS Inc.,

Madison, Wisconsin, U.S.A.

Bruker (2009). SAINT version V7.68A. Bruker AXS Inc., 

Madison, Wisconsin, USA.

Bruker (2010). APEX 2 version 7.0. Bruker AXS Inc., 

Madison, Wisconsin, U.S.A.

Bruker (2010). SADABS version 2010. Bruker AXS Inc., 

Madison, Wisconsin, USA.

Bruker AXS Inc., Madison, Wisconsin, USA.

SHELXTL, version 6.14, Bruker (2003), 

Bruker AXS Inc., Madison, Wisconsin, USA.

Altomare, A., Burla, M.C., Carnalli, M. Cascarano, G. Giacovazzo, 

C., Guagliardi, A.; Moliterni, A.G.G.; Polidori, G. Spagan, R. 

SIR 97 (1999) J. Appl. Cryst. 32, 115-122.

ORTEP3 for Windows - L. J. Farrugia, J. Appl. Crystallogr. 1997, 30, 565

;

#**************************************
data_11
  
_audit_creation_method            SHELXL-97 

_chemical_name_systematic 

; 

 ? 

; 

_chemical_name_common             ? 

_chemical_melting_point           ? 

_chemical_formula_moiety    'C20 H20 B0.50 N O' 

_chemical_formula_sum 

 'C20 H20 B0.50 N O' 

_chemical_formula_weight          295.78 

  

loop_ 
 
_atom_type_symbol 

 _atom_type_description 

 _atom_type_scat_dispersion_real 

 _atom_type_scat_dispersion_imag 

 _atom_type_scat_source 

 'C'  'C'   0.0033   0.0016 

 'International Tables Vol C Tables 4.2.6.8 and 6.1.1.4' 

 'H'  'H'   0.0000   0.0000 

 'International Tables Vol C Tables 4.2.6.8 and 6.1.1.4' 

 'N'  'N'   0.0061   0.0033 

 'International Tables Vol C Tables 4.2.6.8 and 6.1.1.4' 

 'O'  'O'   0.0106   0.0060 

 'International Tables Vol C Tables 4.2.6.8 and 6.1.1.4' 

 'B'  'B'   0.0013   0.0007 

 'International Tables Vol C Tables 4.2.6.8 and 6.1.1.4' 
  
_symmetry_cell_setting            Monoclinic 

_symmetry_space_group_name_H-M    C2/c 
  
loop_ 

 _symmetry_equiv_pos_as_xyz 

 'x, y, z' 

 '-x, y, -z+1/2' 

 'x+1/2, y+1/2, z' 

 '-x+1/2, y+1/2, -z+1/2' 

 '-x, -y, -z' 

 'x, -y, z-1/2' 

 '-x+1/2, -y+1/2, -z' 

 'x+1/2, -y+1/2, z-1/2' 
  
_cell_length_a                    21.4373(15) 

_cell_length_b                    6.1623(4) 

_cell_length_c                    23.2775(16) 

_cell_angle_alpha                 90.00 

_cell_angle_beta                  97.597(4) 

_cell_angle_gamma                 90.00 

_cell_volume                      3048.0(4) 

_cell_formula_units_Z             8 

_cell_measurement_temperature     100(2) 

_cell_measurement_reflns_used     5553 

_cell_measurement_theta_min       2.77 

_cell_measurement_theta_max       27.34 
  
_exptl_crystal_description        'prism frag'

_exptl_crystal_colour             'black'

_exptl_crystal_size_max           0.40 

_exptl_crystal_size_mid           0.39 

_exptl_crystal_size_min           0.15 

_exptl_crystal_density_meas       1.289 

_exptl_crystal_density_diffrn     1.289 

_exptl_crystal_density_method     'not measured' 

_exptl_crystal_F_000              1260 

_exptl_absorpt_coefficient_mu     0.078 

_exptl_absorpt_correction_type    multi-scan

_exptl_absorpt_correction_T_min   0.9694 

_exptl_absorpt_correction_T_max   0.9884 

_exptl_absorpt_process_details    Sadabs
  
_exptl_special_details 

; 

Measurement were carried out on a 

Bruker X8 APEX2 2010 (version 7.0)
 
KAPPA-CCD X-Ray diffractometer system 

(Mo-radiation, \l = 0.71073 \%A, 50KV/30mA power)

Compound was collected at T = 100 K
 
Frames were integrated with the aid of 

the Bruker SAINT version 7.68A software

and using a narrow-frame integration algorithm. 

Absorption corrections were applied to the raw intensity data 

using the SADABS program (version 2010)

; 
  
_diffrn_ambient_temperature       100(2) 

_diffrn_radiation_wavelength      0.71073 

_diffrn_radiation_type            MoK\a 

_diffrn_radiation_source          'fine-focus sealed tube' 

_diffrn_radiation_monochromator   graphite 

_diffrn_measurement_device_type   'Bruker APEX-II CCD' 

_diffrn_measurement_method        '\f and \w scans' 

_diffrn_detector_area_resol_mean  ? 

_diffrn_standards_number          0 

_diffrn_standards_interval_count  ? 

_diffrn_standards_interval_time   ? 

_diffrn_standards_decay_%         ? 

_diffrn_reflns_number             19619 

_diffrn_reflns_av_R_equivalents   0.0323 

_diffrn_reflns_av_sigmaI/netI     0.0237 

_diffrn_reflns_limit_h_min        -25 

_diffrn_reflns_limit_h_max        27 

_diffrn_reflns_limit_k_min        -8 

_diffrn_reflns_limit_k_max        7 

_diffrn_reflns_limit_l_min        -30 

_diffrn_reflns_limit_l_max        30 

_diffrn_reflns_theta_min          1.77 

_diffrn_reflns_theta_max          27.52 

_reflns_number_total              3460 

_reflns_number_gt                 2583 

_reflns_threshold_expression      >2sigma(I) 
  
_computing_data_collection        'Bruker APEX2' 

_computing_cell_refinement        'Bruker SAINT' 

_computing_data_reduction         'Bruker SAINT' 

_computing_structure_solution     'Sir 97' 

_computing_structure_refinement   'SHELXL-97 (Sheldrick, 1997)' 

_computing_molecular_graphics     'Ortep3' 

_computing_publication_material   'Bruker SHELXTL' 
  
_refine_special_details 

; 

 Refinement of F^2^ against ALL reflections.  The weighted R-factor wR and 

 goodness of fit S are based on F^2^, conventional R-factors R are based 

 on F, with F set to zero for negative F^2^. The threshold expression of 

 F^2^ > 2sigma(F^2^) is used only for calculating R-factors(gt) etc. and is 

 not relevant to the choice of reflections for refinement.  R-factors based 

 on F^2^ are statistically about twice as large as those based on F, and R- 

 factors based on ALL data will be even larger. 

; 
  
_refine_ls_structure_factor_coef  Fsqd 

_refine_ls_matrix_type            full 

_refine_ls_weighting_scheme       calc 

_refine_ls_weighting_details 

 'calc w=1/[\s^2^(Fo^2^)+(0.0517P)^2^+2.9244P] where P=(Fo^2^+2Fc^2^)/3' 

_atom_sites_solution_primary      direct 

_atom_sites_solution_secondary    difmap 

_atom_sites_solution_hydrogens    geom 

_refine_ls_hydrogen_treatment    refall

_refine_ls_extinction_method      none 

_refine_ls_extinction_coef        ? 

_refine_ls_number_reflns          3460 

_refine_ls_number_parameters      265 

_refine_ls_number_restraints      0 

_refine_ls_R_factor_all           0.0607 

_refine_ls_R_factor_gt            0.0401 

_refine_ls_wR_factor_ref          0.1157 

_refine_ls_wR_factor_gt           0.1005 

_refine_ls_goodness_of_fit_ref    1.015 

_refine_ls_restrained_S_all       1.015 

_refine_ls_shift/su_max           0.000 

_refine_ls_shift/su_mean          0.000 

  
loop_ 

 _atom_site_label 

 _atom_site_type_symbol 

 _atom_site_fract_x 

 _atom_site_fract_y 

 _atom_site_fract_z 

 _atom_site_U_iso_or_equiv 

 _atom_site_adp_type 

 _atom_site_occupancy 

 _atom_site_symmetry_multiplicity 

 _atom_site_calc_flag 

 _atom_site_refinement_flags 

 _atom_site_disorder_assembly 

 _atom_site_disorder_group 

B1 B 0.0000 0.7343(4) 0.2500 0.0203(4) Uani 1 2 d S . . 

O1 O -0.02005(4) 0.87779(15) 0.29411(4) 0.0220(2) Uani 1 1 d . . . 

N1 N -0.05438(5) 0.58347(19) 0.22434(5) 0.0208(3) Uani 1 1 d . . . 

C1 C -0.07382(6) 0.8511(2) 0.31670(6) 0.0195(3) Uani 1 1 d . . . 

C2 C -0.08794(7) 0.9986(2) 0.35914(6) 0.0226(3) Uani 1 1 d . . . 

C3 C -0.14077(7) 0.9728(2) 0.38563(6) 0.0237(3) Uani 1 1 d . . . 

C4 C -0.23490(7) 0.7557(3) 0.40136(6) 0.0276(3) Uani 1 1 d . . . 

C5 C -0.27216(7) 0.5749(3) 0.38861(7) 0.0298(3) Uani 1 1 d . . . 

C6 C -0.25894(7) 0.4273(3) 0.34670(7) 0.0276(3) Uani 1 1 d . . . 

C7 C -0.19323(7) 0.3187(2) 0.27137(6) 0.0245(3) Uani 1 1 d . . . 

C8 C -0.14464(7) 0.3567(2) 0.24049(6) 0.0236(3) Uani 1 1 d . . . 

C9 C -0.10362(6) 0.5381(2) 0.25304(5) 0.0205(3) Uani 1 1 d . . . 

C20 C -0.04103(7) 0.4411(2) 0.17689(6) 0.0219(3) Uani 1 1 d . . . 

C21 C -0.08423(7) 0.4697(2) 0.11993(6) 0.0223(3) Uani 1 1 d . . . 

C22 C -0.06334(8) 0.3125(2) 0.07556(6) 0.0266(3) Uani 1 1 d . . . 

C23 C -0.10313(9) 0.3323(3) 0.01627(6) 0.0305(4) Uani 1 1 d . . . 

C24 C -0.10522(9) 0.5644(3) -0.00578(6) 0.0304(4) Uani 1 1 d . . . 

C25 C -0.12738(8) 0.7186(3) 0.03859(6) 0.0295(3) Uani 1 1 d . . . 

C26 C -0.08552(8) 0.7012(2) 0.09698(6) 0.0252(3) Uani 1 1 d . . . 

C3A C -0.18180(7) 0.7936(2) 0.37261(6) 0.0225(3) Uani 1 1 d . . . 

C6A C -0.20774(7) 0.4608(2) 0.31612(6) 0.0230(3) Uani 1 1 d . . . 

C9A C -0.11523(6) 0.6789(2) 0.29970(5) 0.0194(3) Uani 1 1 d . . . 

C9B C -0.16828(6) 0.6448(2) 0.32938(6) 0.0201(3) Uani 1 1 d . . . 

H2 H -0.0593(8) 1.118(3) 0.3680(7) 0.0321(10) Uiso 1 1 d . . . 

H3 H -0.1514(8) 1.077(3) 0.4149(8) 0.0321(10) Uiso 1 1 d . . . 

H4 H -0.2437(8) 0.862(3) 0.4317(8) 0.0321(10) Uiso 1 1 d . . . 

H5 H -0.3074(8) 0.554(3) 0.4090(7) 0.0321(10) Uiso 1 1 d . . . 

H6 H -0.2860(8) 0.297(3) 0.3369(7) 0.0321(10) Uiso 1 1 d . . . 

H7 H -0.2202(8) 0.190(3) 0.2632(7) 0.0321(10) Uiso 1 1 d . . . 

H8 H -0.1358(8) 0.254(3) 0.2104(8) 0.0321(10) Uiso 1 1 d . . . 

H20A H -0.0413(8) 0.287(3) 0.1897(7) 0.0321(10) Uiso 1 1 d . . . 

H20B H 0.0035(9) 0.474(3) 0.1694(8) 0.0321(10) Uiso 1 1 d . . . 

H21 H -0.1303(8) 0.432(3) 0.1267(7) 0.0321(10) Uiso 1 1 d . . . 

H22A H -0.0637(8) 0.160(3) 0.0909(8) 0.0321(10) Uiso 1 1 d . . . 

H22B H -0.0196(9) 0.345(3) 0.0715(7) 0.0321(10) Uiso 1 1 d . . . 

H23A H -0.0851(8) 0.232(3) -0.0119(8) 0.0321(10) Uiso 1 1 d . . . 

H23B H -0.1490(9) 0.283(3) 0.0190(8) 0.0321(10) Uiso 1 1 d . . . 

H24A H -0.1335(8) 0.570(3) -0.0435(8) 0.0321(10) Uiso 1 1 d . . . 

H24B H -0.0612(8) 0.612(3) -0.0125(7) 0.0321(10) Uiso 1 1 d . . . 

H25A H -0.1736(8) 0.682(3) 0.0435(7) 0.0321(10) Uiso 1 1 d . . . 

H25B H -0.1266(8) 0.873(3) 0.0238(7) 0.0321(10) Uiso 1 1 d . . . 

H26A H -0.0407(9) 0.740(3) 0.0910(8) 0.0321(10) Uiso 1 1 d . . . 

H26B H -0.1014(8) 0.802(3) 0.1266(8) 0.0321(10) Uiso 1 1 d . . . 
  
loop_ 

 _atom_site_aniso_label 

 _atom_site_aniso_U_11 

 _atom_site_aniso_U_22 

 _atom_site_aniso_U_33 

 _atom_site_aniso_U_23 

 _atom_site_aniso_U_13 

 _atom_site_aniso_U_12 

B1 0.0264(11) 0.0186(10) 0.0157(9) 0.000 0.0025(8) 0.000 

O1 0.0259(5) 0.0196(5) 0.0207(5) -0.0031(4) 0.0034(4) -0.0032(4) 

N1 0.0271(6) 0.0191(6) 0.0157(5) -0.0018(4) 0.0011(4) 0.0002(5) 

C1 0.0232(7) 0.0188(7) 0.0163(6) 0.0015(5) 0.0013(5) 0.0014(5) 

C2 0.0295(7) 0.0188(7) 0.0187(6) -0.0015(5) 0.0005(5) -0.0023(6) 

C3 0.0311(8) 0.0215(7) 0.0180(6) -0.0021(5) 0.0017(5) 0.0030(6) 

C4 0.0296(8) 0.0292(8) 0.0240(7) 0.0002(6) 0.0039(6) 0.0037(6) 

C5 0.0269(8) 0.0328(8) 0.0306(8) 0.0054(6) 0.0069(6) 0.0008(6) 

C6 0.0267(7) 0.0261(8) 0.0293(8) 0.0049(6) 0.0005(6) -0.0032(6) 

C7 0.0295(8) 0.0207(7) 0.0216(7) 0.0011(5) -0.0032(6) -0.0049(6) 

C8 0.0321(8) 0.0202(7) 0.0173(6) -0.0014(5) -0.0018(5) -0.0022(6) 

C9 0.0255(7) 0.0190(7) 0.0154(6) 0.0020(5) -0.0027(5) 0.0008(5) 

C20 0.0280(7) 0.0195(7) 0.0175(6) -0.0022(5) 0.0003(5) 0.0018(6) 

C21 0.0302(7) 0.0196(7) 0.0168(6) -0.0008(5) 0.0022(5) 0.0009(6) 

C22 0.0393(9) 0.0205(7) 0.0200(7) -0.0023(6) 0.0037(6) 0.0033(6) 

C23 0.0487(10) 0.0238(8) 0.0184(7) -0.0030(6) 0.0015(6) 0.0033(7) 

C24 0.0456(9) 0.0269(8) 0.0182(7) 0.0014(6) 0.0030(6) -0.0006(7) 

C25 0.0423(9) 0.0217(7) 0.0229(7) 0.0006(6) -0.0021(6) 0.0028(7) 

C26 0.0350(8) 0.0194(7) 0.0203(7) -0.0012(6) 0.0003(6) 0.0033(6) 

C3A 0.0267(7) 0.0231(7) 0.0171(6) 0.0032(5) 0.0006(5) 0.0034(6) 

C6A 0.0257(7) 0.0221(7) 0.0198(7) 0.0038(5) -0.0022(5) -0.0003(6) 

C9A 0.0241(7) 0.0178(6) 0.0152(6) 0.0013(5) -0.0017(5) 0.0006(5) 

C9B 0.0225(7) 0.0200(7) 0.0163(6) 0.0030(5) -0.0032(5) 0.0014(5) 
  
_geom_special_details 

; 

 All esds (except the esd in the dihedral angle between two l.s. planes) 

 are estimated using the full covariance matrix.  The cell esds are taken 

 into account individually in the estimation of esds in distances, angles 

 and torsion angles; correlations between esds in cell parameters are only 

 used when they are defined by crystal symmetry.  An approximate (isotropic) 

 treatment of cell esds is used for estimating esds involving l.s. planes. 

; 
  
loop_ 

 _geom_bond_atom_site_label_1 

 _geom_bond_atom_site_label_2 

 _geom_bond_distance 

 _geom_bond_site_symmetry_2 

 _geom_bond_publ_flag 

B1 O1 1.4622(16) 2 ? 

B1 O1 1.4622(16) . ? 

B1 N1 1.5477(17) . ? 

B1 N1 1.5477(17) 2 ? 

O1 C1 1.3387(16) . ? 

N1 C9 1.3511(18) . ? 

N1 C20 1.4682(17) . ? 

C1 C2 1.4045(19) . ? 

C1 C9A 1.4066(19) . ? 

C2 C3 1.368(2) . ? 

C2 H2 0.962(19) . ? 

C3 C3A 1.419(2) . ? 

C3 H3 0.986(18) . ? 

C4 C5 1.380(2) . ? 

C4 C3A 1.414(2) . ? 

C4 H4 1.001(18) . ? 

C5 C6 1.390(2) . ? 

C5 H5 0.953(18) . ? 

C6 C6A 1.400(2) . ? 

C6 H6 1.002(18) . ? 

C7 C8 1.362(2) . ? 

C7 C6A 1.426(2) . ? 

C7 H7 0.986(18) . ? 

C8 C9 1.428(2) . ? 

C8 H8 0.979(18) . ? 

C9 C9A 1.4373(19) . ? 

C20 C21 1.5238(18) . ? 

C20 H20A 0.993(18) . ? 

C20 H20B 1.014(18) . ? 

C21 C26 1.5224(19) . ? 

C21 C22 1.526(2) . ? 

C21 H21 1.047(18) . ? 

C22 C23 1.528(2) . ? 

C22 H22A 1.005(18) . ? 

C22 H22B 0.977(18) . ? 

C23 C24 1.519(2) . ? 

C23 H23A 1.012(18) . ? 

C23 H23B 1.040(18) . ? 

C24 C25 1.525(2) . ? 

C24 H24A 1.000(18) . ? 

C24 H24B 1.019(18) . ? 

C25 C26 1.530(2) . ? 

C25 H25A 1.036(18) . ? 

C25 H25B 1.011(18) . ? 

C26 H26A 1.017(18) . ? 

C26 H26B 1.021(18) . ? 

C3A C9B 1.4194(19) . ? 

C6A C9B 1.4238(19) . ? 

C9A C9B 1.4223(19) . ? 
  
loop_ 

 _geom_angle_atom_site_label_1 

 _geom_angle_atom_site_label_2 

 _geom_angle_atom_site_label_3 

 _geom_angle 

 _geom_angle_site_symmetry_1 

 _geom_angle_site_symmetry_3 

 _geom_angle_publ_flag 

O1 B1 O1 105.57(16) 2 . ? 

O1 B1 N1 111.62(6) 2 . ? 

O1 B1 N1 110.97(6) . . ? 

O1 B1 N1 110.97(6) 2 2 ? 

O1 B1 N1 111.62(6) . 2 ? 

N1 B1 N1 106.19(16) . 2 ? 

C1 O1 B1 123.35(10) . . ? 

C9 N1 C20 119.40(12) . . ? 

C9 N1 B1 122.10(9) . . ? 

C20 N1 B1 115.95(10) . . ? 

O1 C1 C2 118.27(12) . . ? 

O1 C1 C9A 121.76(12) . . ? 

C2 C1 C9A 119.96(13) . . ? 

C3 C2 C1 120.66(13) . . ? 

C3 C2 H2 122.3(10) . . ? 

C1 C2 H2 117.0(10) . . ? 

C2 C3 C3A 121.39(13) . . ? 

C2 C3 H3 121.1(10) . . ? 

C3A C3 H3 117.5(10) . . ? 

C5 C4 C3A 120.73(14) . . ? 

C5 C4 H4 121.5(10) . . ? 

C3A C4 H4 117.7(10) . . ? 

C4 C5 C6 120.87(14) . . ? 

C4 C5 H5 118.5(11) . . ? 

C6 C5 H5 120.7(11) . . ? 

C5 C6 C6A 120.45(14) . . ? 

C5 C6 H6 121.3(10) . . ? 

C6A C6 H6 118.2(10) . . ? 

C8 C7 C6A 122.42(13) . . ? 

C8 C7 H7 120.5(10) . . ? 

C6A C7 H7 117.1(10) . . ? 

C7 C8 C9 121.30(13) . . ? 

C7 C8 H8 120.0(10) . . ? 

C9 C8 H8 118.6(10) . . ? 

N1 C9 C8 124.12(12) . . ? 

N1 C9 C9A 118.25(12) . . ? 

C8 C9 C9A 117.62(13) . . ? 

N1 C20 C21 115.40(11) . . ? 

N1 C20 H20A 109.6(10) . . ? 

C21 C20 H20A 110.2(10) . . ? 

N1 C20 H20B 106.9(10) . . ? 

C21 C20 H20B 107.8(10) . . ? 

H20A C20 H20B 106.6(14) . . ? 

C26 C21 C20 113.24(12) . . ? 

C26 C21 C22 110.54(12) . . ? 

C20 C21 C22 108.45(12) . . ? 

C26 C21 H21 106.8(10) . . ? 

C20 C21 H21 108.6(10) . . ? 

C22 C21 H21 109.1(10) . . ? 

C21 C22 C23 112.44(13) . . ? 

C21 C22 H22A 109.7(10) . . ? 

C23 C22 H22A 111.4(10) . . ? 

C21 C22 H22B 107.8(10) . . ? 

C23 C22 H22B 108.9(10) . . ? 

H22A C22 H22B 106.3(14) . . ? 

C24 C23 C22 111.62(13) . . ? 

C24 C23 H23A 110.5(10) . . ? 

C22 C23 H23A 108.7(10) . . ? 

C24 C23 H23B 108.2(10) . . ? 

C22 C23 H23B 109.9(10) . . ? 

H23A C23 H23B 107.9(14) . . ? 

C23 C24 C25 110.85(13) . . ? 

C23 C24 H24A 108.4(10) . . ? 

C25 C24 H24A 111.5(10) . . ? 

C23 C24 H24B 109.6(10) . . ? 

C25 C24 H24B 107.7(10) . . ? 

H24A C24 H24B 108.7(14) . . ? 

C24 C25 C26 111.05(13) . . ? 

C24 C25 H25A 109.1(10) . . ? 

C26 C25 H25A 110.1(9) . . ? 

C24 C25 H25B 109.5(10) . . ? 

C26 C25 H25B 109.6(10) . . ? 

H25A C25 H25B 107.5(14) . . ? 

C21 C26 C25 111.03(12) . . ? 

C21 C26 H26A 107.2(10) . . ? 

C25 C26 H26A 108.3(10) . . ? 

C21 C26 H26B 109.0(10) . . ? 

C25 C26 H26B 110.4(10) . . ? 

H26A C26 H26B 110.8(14) . . ? 

C4 C3A C3 122.86(13) . . ? 

C4 C3A C9B 118.77(13) . . ? 

C3 C3A C9B 118.36(13) . . ? 

C6 C6A C9B 119.34(13) . . ? 

C6 C6A C7 122.84(13) . . ? 

C9B C6A C7 117.82(13) . . ? 

C1 C9A C9B 119.35(12) . . ? 

C1 C9A C9 120.14(12) . . ? 

C9B C9A C9 120.50(12) . . ? 

C3A C9B C9A 120.03(12) . . ? 

C3A C9B C6A 119.81(13) . . ? 

C9A C9B C6A 120.16(12) . . ? 

  
_diffrn_measured_fraction_theta_max    0.987 

_diffrn_reflns_theta_full              27.52 

_diffrn_measured_fraction_theta_full   0.987 

_refine_diff_density_max    0.303 

_refine_diff_density_min   -0.197 

_refine_diff_density_rms    0.041 


#====END
